# Supplementary material for: Implication of Hepsin from Primary Tumor in the Prognosis of Colorectal Cancer Patients
Source: MDPI journal article supplement (doi:10.3390/cancers14133106), 2022-06-24
Supplement: s1 [file s1]

Table S6. Correlations between Hepsin staining intensity and time-to-event variables in metastatic patients with mutated RAS. Upper table shows correlations based on the Kaplan–Meier estimator and the Log-rank for trends and Gray’s tests. Lower tables show Cox and Fine and Gray multivariate models. HPN: Hepsin; N: number of patients for each hepsin level; CI: confidence interval; LL: lower limit; UL: upper limit; tft: Log-rank test for trends; Stat: statistical value; df: degrees of freedom; OS: overall survival; Coef: Cox regression coefficient; exp (coef): hazard ratio; se (coef): standard error of Cox regression coefficient; p: p-value; ECOG: Eastern Cooperative Oncology Group; PFS: progression-free survival after first-line chemotherapy; \*: significant *p*-value. † Follow-up limit reached.

| HPN staining intensity | N  | Death events       | 5-year overall survival (%)                                | Standard error (%) | LL CI 95% (%) | UL CI 95% (%) | p-value tft |             |    |         |
|------------------------|----|--------------------|------------------------------------------------------------|--------------------|---------------|---------------|-------------|-------------|----|---------|
| High                   | 26 | 25                 | 5                                                          | 5                  | 1             | 31            | 0.09        |             |    |         |
| Medium                 | 22 | 16                 | 39                                                         | 11                 | 23            | 67            |             |             |    |         |
| Low                    | 15 | 11                 | 23                                                         | 11                 | 9             | 61            |             |             |    |         |
| HPN staining intensity | N  | Progression events | 4-year <sup>†</sup> progression-free survival (%)          | Standard error (%) | LL CI 95% (%) | UL CI 95% (%) | p-value tft |             |    |         |
| High                   | 23 | 22                 | 9                                                          | 6                  | 2             | 33            | 0.42        |             |    |         |
| Medium                 | 22 | 20                 | 9                                                          | 6                  | 2             | 34            |             |             |    |         |
| Low                    | 15 | 14                 | 7                                                          | 6                  | 1             | 44            |             |             |    |         |
| HPN staining intensity | N  | Thrombosis events  | 4-year <sup>†</sup> cumulative incidence of thrombosis (%) | Standard error (%) | LL CI 95% (%) | UL CI 95% (%) | p-value tft | Gray’s test |    |         |
|                        |    |                    |                                                            |                    |               |               |             | Stat        | df | p-value |
| High                   | 26 | 10                 | 52                                                         | 12                 | 21            | 71            | 0.48        | 0.69        | 2  | 0.71    |
| Medium                 | 22 | 8                  | 30                                                         | 10                 | 6             | 47            |             |             |    |         |
| Low                    | 15 | 6                  | 43                                                         | 14                 | 9             | 64            |             |             |    |         |

| Multivariate Cox regression for PFS                      |       |           |                           |                           |          |        |
|----------------------------------------------------------|-------|-----------|---------------------------|---------------------------|----------|--------|
| Regressions                                              | Coef  | exp(coef) | LL CI 95% of<br>exp(coef) | UL CI 95% of<br>exp(coef) | se(coef) | p      |
| HPN Medium                                               | -0.05 | 0.95      | 0.44                      | 2.05                      | 0.39     | 0.90   |
| HPN High                                                 | 0.09  | 1.10      | 0.45                      | 2.68                      | 0.46     | 0.84   |
| HPN Low (reference)                                      | -     | -         | -                         | -                         | -        | -      |
| Moderately differentiated<br>histological grade          | 0.48  | 1.61      | 0.67                      | 3.84                      | 0.44     | 0.28   |
| Poorly differentiated<br>histological grade              | 1.24  | 3.47      | 1.48                      | 8.16                      | 0.44     | 0.004* |
| Well differentiated<br>histological grade<br>(reference) | -     | -         | -                         | -                         | -        | -      |
| ECOG 1                                                   | -0.13 | 0.88      | 0.44                      | 1.76                      | 0.36     | 0.71   |
| ECOG 2                                                   | 0.25  | 1.28      | 0.53                      | 3.07                      | 0.45     | 0.58   |
| ECOG 0 (reference)                                       | -     | -         | -                         | -                         | -        | -      |
| >1 metastasis site                                       | 1.32  | 3.73      | 1.41                      | 9.84                      | 0.49     | 0.008* |
| 1 metastasis site<br>(reference)                         | -     | -         | -                         | -                         | -        | -      |
| Peritoneal involvement                                   | -0.66 | 0.52      | 0.17                      | 1.52                      | 0.55     | 0.23   |
| No peritoneal involvement<br>(reference)                 | -     | -         | -                         | -                         | -        | -      |
| Lung involvement                                         | -1.49 | 0.22      | 0.08                      | 0.60                      | 0.50     | 0.003* |
| No lung involvement<br>(reference)                       | -     | -         | -                         | -                         | -        | -      |
| Liver involvement                                        | -1.47 | 0.23      | 0.08                      | 0.68                      | 0.55     | 0.008* |
| No liver involvement<br>(reference)                      | -     | -         | -                         | -                         | -        | -      |

| Multivariate Cox regression for OS                       |       |           |                           |                           |          |        |
|----------------------------------------------------------|-------|-----------|---------------------------|---------------------------|----------|--------|
| Regressions                                              | Coef  | exp(coef) | LL CI 95% of<br>exp(coef) | UL CI 95% of<br>exp(coef) | se(coef) | p      |
| HPN Medium                                               | -0.21 | 0.81      | 0.31                      | 2.13                      | 0.49     | 0.67   |
| HPN High                                                 | 0.42  | 1.51      | 0.63                      | 3.65                      | 0.45     | 0.35   |
| HPN Low (reference)                                      | -     | -         | -                         | -                         | -        | -      |
| Moderately differentiated<br>histological grade          | 0.72  | 2.05      | 0.92                      | 4.56                      | 0.41     | 0.08   |
| Poorly differentiated<br>histological grade              | 1.19  | 3.29      | 1.38                      | 7.86                      | 0.44     | 0.007* |
| Well differentiated<br>histological grade<br>(reference) | -     | -         | -                         | -                         | -        | -      |
| ECOG 1                                                   | -0.28 | 0.76      | 0.36                      | 1.60                      | 0.38     | 0.47   |
| ECOG 2                                                   | 1.02  | 2.76      | 1.07                      | 7.17                      | 0.49     | 0.037* |
| ECOG 0 (reference)                                       | -     | -         | -                         | -                         | -        | -      |
| >1 metastasis site                                       | 0.89  | 2.44      | 0.94                      | 6.38                      | 0.49     | 0.07   |
| 1 metastasis site<br>(reference)                         | -     | -         | -                         | -                         | -        | -      |
| Peritoneal involvement                                   | -0.21 | 0.81      | 0.29                      | 2.24                      | 0.52     | 0.69   |
| No peritoneal involvement<br>(reference)                 | -     | -         | -                         | -                         | -        | -      |
| Lung involvement                                         | -1.31 | 0.27      | 0.10                      | 0.73                      | 0.51     | 0.01*  |
| No lung involvement<br>(reference)                       | -     | -         | -                         | -                         | -        | -      |
| Liver involvement                                        | -0.66 | 0.52      | 0.20                      | 1.33                      | 0.48     | 0.17   |
| No liver involvement<br>(reference)                      | -     | -         | -                         | -                         | -        | -      |

| Multivariate Fine&Gray regression for cumulative incidence of thrombosis |       |           |                              |                              |          |        |
|--------------------------------------------------------------------------|-------|-----------|------------------------------|------------------------------|----------|--------|
| Regressions                                                              | Coef  | exp(coef) | LL CI 95%<br>of<br>exp(coef) | UL CI<br>95% of<br>exp(coef) | se(coef) | p      |
| HPN Medium                                                               | -0.58 | 0.56      | 0.18                         | 1.78                         | 0.59     | 0.33   |
| HPN High                                                                 | -0.65 | 0.52      | 0.16                         | 1.71                         | 0.61     | 0.28   |
| HPN Low (reference)                                                      | -     | -         | -                            | -                            | -        | -      |
| Moderately differentiated histological grade                             | -0.53 | 0.59      | 0.16                         | 2.21                         | 0.68     | 0.43   |
| Poorly differentiated histological grade                                 | 1.59  | 4.91      | 1.19                         | 20.32                        | 0.73     | 0.028* |
| Well differentiated histological grade (reference)                       | -     | -         | -                            | -                            | -        | -      |
| Lymphovascular invasion                                                  | -0.37 | 0.69      | 0.27                         | 1.72                         | 0.47     | 0.43   |
| Absent lymphovascular invasion (reference)                               | -     | -         | -                            | -                            | -        | -      |
| >1 metastasis site                                                       | -1.84 | 0.16      | 0.01                         | 1.88                         | 1.26     | 0.14   |
| 1 metastasis site (reference)                                            | -     | -         | -                            | -                            | -        | -      |
| Peritoneal involvement                                                   | 0.78  | 2.19      | 0.22                         | 21.31                        | 1.16     | 0.50   |
| No peritoneal involvement (reference)                                    | -     | -         | -                            | -                            | -        | -      |
| Lung involvement                                                         | 2.87  | 17.62     | 0.89                         | 348.05                       | 1.52     | 0.06   |
| No lung involvement (reference)                                          | -     | -         | -                            | -                            | -        | -      |
| Liver involvement                                                        | 1.89  | 6.58      | 0.39                         | 110.42                       | 1.44     | 0.19   |
| No liver involvement (reference)                                         | -     | -         | -                            | -                            | -        | -      |
