# Supplementary material for: Implication of Hepsin from Primary Tumor in the Prognosis of Colorectal Cancer Patients
Source: MDPI journal article supplement (doi:10.3390/cancers14133106), 2022-06-24
Supplement: s1 [file s1]

Table S1. Percentage of patients in the overall, localized and metastatic cohort with different intensities of Hepsin staining in each of the discrete clinical and histopathological categories recorded. The *p*-values of Pearson's Chi-square correlations performed between hepsin and these variables are shown. HPN: Hepsin; N (%): Number and percentage of patients; ECOG: Eastern Cooperative Oncology Group; TNM II: T-stage 3/4, N-stage 0, M-stage 0; TNM III: T-stage 1/2/3/4, N-stage 1/2, M-stage 0; TNM IV: T-stage 1/2/3/4, N-stage 0/1/2, M-stage 1; T-stage: size and extension of the primary tumor; N-stage: tumor involvement of nearby lymph nodes; \*: significant *p*-value.

| Overall cohort                                           | HPN staining intensity |           |           | p-value from Chi-square test |
|----------------------------------------------------------|------------------------|-----------|-----------|------------------------------|
| Clinical/histopathological variables correlated with HPN | Low                    | Medium    | High      |                              |
| Sex                                                      |                        |           |           | 0.819                        |
| Men: N (%)                                               | 39 (20.9)              | 66 (35.3) | 82 (43.9) |                              |
| Women: N (%)                                             | 22 (22.0)              | 38 (38.0) | 40 (40.0) |                              |
| ECOG at diagnosis                                        |                        |           |           | 0.736                        |
| 0: N (%)                                                 | 23 (20.0)              | 48 (41.7) | 44 (38.3) |                              |
| 1: N (%)                                                 | 27 (22.1)              | 40 (32.8) | 55 (45.1) |                              |
| 2: N (%)                                                 | 5 (15.2)               | 11 (33.3) | 17 (51.5) |                              |
| ≥3: N (%)                                                | 1 (25.0)               | 1 (25.0)  | 2 (50.0)  |                              |
| Primary tumor site                                       |                        |           |           | 0.551                        |
| Ascending colon: N (%)                                   | 19 (22.9)              | 31 (37.3) | 33 (39.8) |                              |
| Descending colon: N (%)                                  | 1 (7.1)                | 5 (35.7)  | 8 (57.1)  |                              |
| Transverse colon: N (%)                                  | 3 (20.0)               | 8 (53.3)  | 4 (26.7)  |                              |
| Sigmoid colon: N (%)                                     | 12 (18.5)              | 24 (36.9) | 29 (44.6) |                              |
| Rectal: N (%)                                            | 26 (26.3)              | 30 (30.3) | 43 (43.4) |                              |
| Number of chemotherapy lines                             |                        |           |           | 0.231                        |
| 1: N (%)                                                 | 11 (21.2)              | 20 (38.5) | 21 (40.4) |                              |
| 2: N (%)                                                 | 11 (28.2)              | 10 (25.6) | 18 (46.2) |                              |
| 3: N (%)                                                 | 5 (14.3)               | 17 (48.6) | 13 (37.1) |                              |
| 4: N (%)                                                 | 3 (20.0)               | 4 (26.7)  | 8 (53.3)  |                              |
| ≥5: N (%)                                                | 0 (0.0)                | 9 (52.9)  | 8 (47.1)  |                              |
| RAS mutations                                            |                        |           |           | 0.574                        |
| Yes: N (%)                                               | 17 (17.3)              | 38 (38.8) | 43 (43.9) |                              |
| No: N (%)                                                | 15 (23.1)              | 21 (32.3) | 29 (44.6) |                              |
| BRAF mutations                                           |                        |           |           | 0.579                        |
| Yes: N (%)                                               | 2 (33.3)               | 1 (16.7)  | 3 (50.0)  |                              |
| No: N (%)                                                | 27 (20.5)              | 47 (35.6) | 58 (43.9) |                              |
| Microsatellite instability                               |                        |           |           | 0.172                        |
| Yes: N (%)                                               | 2 (13.3)               | 3 (20.0)  | 10 (66.7) |                              |
| No: N (%)                                                | 26 (21.8)              | 44 (37.0) | 49 (41.2) |                              |
| Histologic grade                                         |                        |           |           | <0.001*                      |
| Well differentiated: N (%)                               | 22 (17.3)              | 55 (43.3) | 50 (39.4) |                              |
| Moderately differentiated: N (%)                         | 14 (16.5)              | 26 (30.6) | 45 (52.9) |                              |

|                                                          |                        |           |           |                              |
|----------------------------------------------------------|------------------------|-----------|-----------|------------------------------|
| Poorly differentiated: N (%)                             | 13 (46.4)              | 4 (14.3)  | 11 (39.3) | 0.656                        |
| Lymphovascular invasion                                  |                        |           |           |                              |
| No: N (%)                                                | 21 (21.9)              | 35 (36.5) | 40 (41.7) |                              |
| Yes: N (%)                                               | 21 (17.1)              | 46 (37.4) | 56 (45.5) | 0.633                        |
| Perineural invasion                                      |                        |           |           |                              |
| No: N (%)                                                | 31 (19.4)              | 56 (35.0) | 73 (45.6) |                              |
| Yes: N (%)                                               | 10 (17.5)              | 24 (42.1) | 23 (40.4) | 0.197                        |
| Presence of tumor deposits distant to the primary tumor  |                        |           |           |                              |
| No: N (%)                                                | 36 (20.6)              | 62 (35.4) | 77 (44.0) |                              |
| Yes: N (%)                                               | 5 (12.5)               | 20 (50.0) | 15 (37.5) | 0.727                        |
| Tumor stages: TNM II vs III vs IV                        |                        |           |           |                              |
| II: N (%)                                                | 12 (21.8)              | 19 (34.5) | 24 (43.6) |                              |
| III: N (%)                                               | 14 (15.6)              | 36 (40.0) | 40 (44.4) |                              |
| IV: N (%)                                                | 27 (22.9)              | 40 (33.9) | 51 (43.2) | 0.750                        |
| Tumor stages: TNM II-III vs IV                           |                        |           |           |                              |
| II-III: N (%)                                            | 34 (20.1)              | 64 (37.9) | 71 (42.0) |                              |
| IV: N (%)                                                | 27 (22.9)              | 40 (33.9) | 51 (43.2) | 0.110                        |
| T-stage                                                  |                        |           |           |                              |
| T1: N (%)                                                | 2 (25.0)               | 2 (25.0)  | 4 (50.0)  |                              |
| T2: N (%)                                                | 3 (17.6)               | 3 (17.6)  | 11 (64.7) |                              |
| T3: N (%)                                                | 23 (16.1)              | 53 (37.1) | 67 (46.9) |                              |
| T4: N (%)                                                | 12 (25.0)              | 23 (47.9) | 13 (27.1) | 0.611                        |
| N-stage                                                  |                        |           |           |                              |
| N0: N (%)                                                | 16 (21.3)              | 27 (36.0) | 32 (42.7) |                              |
| N1: N (%)                                                | 16 (19.5)              | 33 (40.2) | 33 (40.2) |                              |
| N2: N (%)                                                | 7 (12.3)               | 21 (36.8) | 29 (50.9) |                              |
|                                                          |                        |           |           |                              |
| Localized cohort                                         | HPN staining intensity |           |           | p-value from Chi-square test |
| Clinical/histopathological variables correlated with HPN | Low                    | Medium    | High      |                              |
| Sex                                                      |                        |           |           | 0.902                        |
| Men: N (%)                                               | 21 (19.3)              | 41 (37.6) | 47 (43.1) |                              |
| Women: N (%)                                             | 13 (21.7)              | 23 (38.3) | 24 (40.0) |                              |
| ECOG at diagnosis                                        |                        |           |           | 0.334                        |
| 0: N (%)                                                 | 15 (17.6)              | 38 (44.7) | 32 (37.6) |                              |
| 1: N (%)                                                 | 15 (22.4)              | 21 (31.3) | 31 (46.3) |                              |
| 2: N (%)                                                 | 2 (18.2)               | 2 (18.2)  | 7 (63.6)  |                              |
| ≥3: N (%)                                                | 0 (0.0)                | 1 (100.0) | 0 (0.0)   | 0.513                        |
| Primary tumor site                                       |                        |           |           |                              |
| Ascending colon: N (%)                                   | 12 (25.0)              | 16 (33.3) | 20 (41.7) |                              |
| Descending colon: N (%)                                  | 1 (11.1)               | 3 (33.3)  | 5 (55.6)  |                              |
| Transverse colon: N (%)                                  | 1 (10.0)               | 6 (60.0)  | 3 (30.0)  |                              |
| Sigmoid colon: N (%)                                     | 4 (11.4)               | 16 (45.7) | 15 (42.9) |                              |
| Rectal: N (%)                                            | 16 (25.0)              | 21 (32.8) | 27 (42.2) | 0.275                        |
| Number of chemotherapy lines                             |                        |           |           |                              |
| 1: N (%)                                                 | 5 (22.7)               | 6 (27.3)  | 11 (50.0) |                              |
| 2: N (%)                                                 | 0 (0.0)                | 5 (50.0)  | 5 (50.0)  |                              |
| 3: N (%)                                                 | 0 (0.0)                | 6 (50.0)  | 6 (50.0)  |                              |
| 4: N (%)                                                 | 0 (0.0)                | 1 (33.3)  | 2 (66.6)  |                              |
| ≥5: N (%)                                                | 1 (25.0)               | 3 (75.0)  | 0 (0.0)   |                              |

|                                                          |                        |           |           |                              |
|----------------------------------------------------------|------------------------|-----------|-----------|------------------------------|
| RAS mutations                                            |                        |           |           | 0.381                        |
| Yes: N (%)                                               | 2 (5.7)                | 16 (45.7) | 17 (48.6) |                              |
| No: N (%)                                                | 4 (16.7)               | 9 (37.5)  | 11 (45.8) |                              |
| BRAF mutations                                           |                        |           |           | 0.168                        |
| Yes: N (%)                                               | 1 (50.0)               | 0 (0.0)   | 1 (50.0)  |                              |
| No: N (%)                                                | 5 (9.8)                | 21 (41.2) | 25 (49.0) |                              |
| Microsatellite instability                               |                        |           |           | 0.218                        |
| Yes: N (%)                                               | 2 (15.4)               | 2 (15.4)  | 9 (69.2)  |                              |
| No: N (%)                                                | 13 (17.1)              | 29 (38.2) | 34 (44.7) |                              |
| Histologic grade                                         |                        |           |           | 0.057                        |
| Well differentiated: N (%)                               | 17 (18.9)              | 33 (36.7) | 40 (44.4) |                              |
| Moderately differentiated: N (%)                         | 10 (18.9)              | 23 (43.4) | 20 (37.7) |                              |
| Poorly differentiated: N (%)                             | 5 (50.0)               | 0 (0.0)   | 5 (50.0)  |                              |
| Lymphovascular invasion                                  |                        |           |           | 0.626                        |
| No: N (%)                                                | 16 (21.3)              | 28 (37.3) | 31 (41.3) |                              |
| Yes: N (%)                                               | 12 (15.8)              | 28 (36.8) | 36 (47.4) |                              |
| Perineural invasion                                      |                        |           |           | 0.653                        |
| No: N (%)                                                | 23 (19.7)              | 44 (37.6) | 50 (42.7) |                              |
| Yes: N (%)                                               | 5 (15.2)               | 11 (33.3) | 17 (51.5) |                              |
| Presence of tumor deposits distant to the primary tumor  |                        |           |           | 0.156                        |
| No: N (%)                                                | 26 (20.5)              | 46 (36.2) | 55 (43.3) |                              |
| Yes: N (%)                                               | 2 (10.0)               | 9 (45.0)  | 9 (45.0)  |                              |
| Tumor stages: TNM II vs III                              |                        |           |           | 0.601                        |
| II: N (%)                                                | 12 (21.8)              | 19 (34.5) | 24 (43.6) |                              |
| III: N (%)                                               | 14 (15.6)              | 36 (40.0) | 40 (44.4) |                              |
| T-stage                                                  |                        |           |           | 0.256                        |
| T1: N (%)                                                | 2 (40.0)               | 1 (20.0)  | 2 (40.0)  |                              |
| T2: N (%)                                                | 3 (20.0)               | 3 (20.0)  | 9 (60.0)  |                              |
| T3: N (%)                                                | 17 (16.0)              | 40 (37.7) | 49 (46.2) |                              |
| T4: N (%)                                                | 5 (23.8)               | 11 (52.4) | 5 (23.8)  |                              |
| N-stage                                                  |                        |           |           | 0.357                        |
| N0: N (%)                                                | 12 (21.8)              | 19 (34.5) | 24 (43.6) |                              |
| N1: N (%)                                                | 12 (20.3)              | 24 (40.7) | 23 (39.0) |                              |
| N2: N (%)                                                | 2 (6.5)                | 12 (38.7) | 17 (54.8) |                              |
|                                                          |                        |           |           |                              |
| Metastatic cohort                                        | HPN staining intensity |           |           | p-value from Chi-square test |
| Clinical/histopathological variables correlated with HPN | Low                    | Medium    | High      |                              |
| Sex                                                      |                        |           |           | 0.827                        |
| Men: N (%)                                               | 18 (23.1)              | 25 (32.1) | 35 (44.9) |                              |
| Women: N (%)                                             | 9 (22.5)               | 15 (37.5) | 16 (40.0) |                              |
| ECOG at diagnosis                                        |                        |           |           | 0.814                        |
| 0: N (%)                                                 | 8 (26.7)               | 10 (33.3) | 12 (40.0) |                              |
| 1: N (%)                                                 | 12 (21.8)              | 19 (34.5) | 24 (43.6) |                              |
| 2: N (%)                                                 | 3 (13.6)               | 9 (40.9)  | 10 (45.5) |                              |
| ≥3: N (%)                                                | 1 (33.3)               | 0 (0.0)   | 2 (66.7)  | 0.645                        |
| Primary tumor site                                       |                        |           |           |                              |
| Ascending colon: N (%)                                   | 7 (20.0)               | 15 (42.9) | 13 (37.1) |                              |
| Descending colon: N (%)                                  | 0 (0.0)                | 2 (40.0)  | 3 (60.0)  |                              |
| Transverse colon: N (%)                                  | 2 (40.0)               | 2 (40.0)  | 1 (20.0)  |                              |

|                                                         |           |           |           |         |
|---------------------------------------------------------|-----------|-----------|-----------|---------|
| Sigmoid colon: N (%)                                    | 8 (26.7)  | 8 (26.7)  | 14 (46.7) |         |
| Rectal: N (%)                                           | 10 (28.6) | 9 (25.7)  | 16 (45.7) |         |
| Liver metastasis at diagnosis                           |           |           |           | 0.810   |
| Yes: N (%)                                              | 20 (23.8) | 27 (32.1) | 37 (44.0) |         |
| No: N (%)                                               | 7 (20.6)  | 13 (38.2) | 14 (41.2) |         |
| Peritoneal metastasis at diagnosis                      |           |           |           | 0.110   |
| Yes: N (%)                                              | 11 (34.4) | 7 (21.9)  | 14 (43.8) |         |
| No: N (%)                                               | 16 (18.6) | 33 (38.4) | 37 (43.0) |         |
| Lung metastasis at diagnosis                            |           |           |           | 0.245   |
| Yes: N (%)                                              | 10 (32.3) | 11 (35.5) | 10 (32.3) |         |
| No: N (%)                                               | 17 (19.5) | 29 (33.3) | 41 (47.1) |         |
| >1 metastasis site at diagnosis                         |           |           |           | 0.023*  |
| Yes: N (%)                                              | 16 (34.8) | 16 (34.8) | 14 (30.4) |         |
| No: N (%)                                               | 11 (15.3) | 24 (33.3) | 37 (51.4) |         |
| Number of chemotherapy lines                            |           |           |           | 0.106   |
| 1: N (%)                                                | 6 (20.0)  | 14 (46.7) | 10 (33.3) |         |
| 2: N (%)                                                | 11 (37.9) | 5 (17.2)  | 13 (44.8) |         |
| 3: N (%)                                                | 5 (21.7)  | 11 (47.8) | 7 (30.4)  |         |
| 4: N (%)                                                | 3 (25.0)  | 3 (25.0)  | 6 (50.0)  |         |
| ≥5: N (%)                                               | 0 (0.0)   | 6 (46.2)  | 7 (53.8)  |         |
| RAS mutations                                           |           |           |           | 0.829   |
| Yes: N (%)                                              | 15 (23.8) | 22 (34.9) | 26 (41.3) |         |
| No: N (%)                                               | 11 (26.8) | 12 (29.3) | 18 (43.9) |         |
| BRAF mutations                                          |           |           |           | 0.929   |
| Yes: N (%)                                              | 1 (25.0)  | 1 (25.0)  | 2 (50.0)  |         |
| No: N (%)                                               | 22 (27.2) | 26 (32.1) | 33 (40.7) |         |
| Microsatellite instability                              |           |           |           | 0.654   |
| Yes: N (%)                                              | 0 (0.0)   | 1 (50.0)  | 1 (50.0)  |         |
| No: N (%)                                               | 13 (30.2) | 15 (34.9) | 15 (34.9) |         |
| Histologic grade                                        |           |           |           | <0.001* |
| Well differentiated: N (%)                              | 5 (13.5)  | 22 (59.5) | 10 (27.0) |         |
| Moderately differentiated: N (%)                        | 4 (12.5)  | 3 (9.4)   | 25 (78.1) |         |
| Poorly differentiated: N (%)                            | 8 (44.4)  | 4 (22.2)  | 6 (33.3)  |         |
| Lymphovascular invasion                                 |           |           |           | 0.626   |
| No: N (%)                                               | 16 (21.3) | 28 (37.3) | 31 (41.3) |         |
| Yes: N (%)                                              | 12 (15.8) | 28 (36.8) | 36 (47.4) |         |
| Perineural invasion                                     |           |           |           | 0.653   |
| No: N (%)                                               | 23 (19.7) | 44 (37.6) | 50 (42.7) |         |
| Yes: N (%)                                              | 5 (15.2)  | 11 (33.3) | 17 (51.5) |         |
| Presence of tumor deposits distant to the primary tumor |           |           |           | 0.156   |
| No: N (%)                                               | 26 (20.5) | 46 (36.2) | 55 (43.3) |         |
| Yes: N (%)                                              | 2 (10.0)  | 9 (45.0)  | 9 (45.0)  |         |
| T-stage                                                 |           |           |           | 0.399   |
| T1: N (%)                                               | 0 (0.0)   | 1 (33.3)  | 2 (66.6)  |         |
| T2: N (%)                                               | 0 (0.0)   | 0 (0.0)   | 2 (100.0) |         |
| T3: N (%)                                               | 6 (16.2)  | 13 (35.1) | 18 (48.6) |         |
| T4: N (%)                                               | 7 (25.9)  | 12 (44.4) | 8 (29.6)  |         |
| N-stage                                                 |           |           |           | 0.993   |
| N0: N (%)                                               | 4 (20.0)  | 8 (40.0)  | 8 (40.0)  |         |
| N1: N (%)                                               | 4 (17.4)  | 9 (39.1)  | 10 (43.5) |         |

|           |          |          |           |  |
|-----------|----------|----------|-----------|--|
| N2: N (%) | 5 (19.2) | 9 (34.6) | 12 (46.2) |  |
|-----------|----------|----------|-----------|--|
