# Supplementary material for: Implication of Hepsin from Primary Tumor in the Prognosis of Colorectal Cancer Patients
Source: MDPI journal article supplement (doi:10.3390/cancers14133106), 2022-06-24
Supplement: s1 [file s1]

Table S3. Correlations between Hepsin staining intensity and continuous clinical-histopathological variables. The results of these correlations are shown for the overall cohort and localized and metastatic patients separately. HPN: Hepsin; CEA: carcinoembryonic antigen; LDH: lactate dehydrogenase.

| <b>Overall cohort</b>                                                               | HPN staining intensity |             |              | p-value from Kruskal-Wallis test |
|-------------------------------------------------------------------------------------|------------------------|-------------|--------------|----------------------------------|
| Clinical/histopathological variables correlated with HPN                            | Low                    | Medium      | High         |                                  |
| Age at diagnosis (years): Mean; standard error of mean                              | 62.5; 1.8              | 62.9; 1.2   | 66.1; 0.9    | 0.176                            |
| CEA (ng/ml): Mean; standard error of mean                                           | 49.1; 20.4             | 30.7; 8.9   | 22.1; 4.7    | 0.334                            |
| Leukocytes (x10 <sup>3</sup> /μl): Mean; standard error of mean                     | 8.0; 0.3               | 8.6; 0.4    | 8.3; 0.3     | 0.573                            |
| Platelets (x10 <sup>3</sup> /μl): Mean; standard error of mean                      | 307.0; 17.7            | 281.0; 12.7 | 278.0; 10.9  | 0.368                            |
| LDH (U/l): Mean; standard error of mean                                             | 420.0; 76.3            | 497.0; 63.1 | 578.0; 107.0 | 0.828                            |
| Number of tumor deposits distant to the primary tumor: Mean; standard error of mean | 1.0; 0.7               | 0.8; 0.2    | 0.4; 0.1     | 0.508                            |
|                                                                                     |                        |             |              |                                  |
| <b>Localized cohort</b>                                                             | HPN staining intensity |             |              | p-value from Kruskal-Wallis test |
| Clinical/histopathological variables correlated with HPN                            | Low                    | Medium      | High         |                                  |
| Age at diagnosis (years): Mean; standard error of mean                              | 60.9; 2.3              | 62.3; 1.4   | 65.4; 1.1    | 0.223                            |
| CEA (ng/ml): Mean; standard error of mean                                           | 5.8; 2.7               | 6.9; 1.9    | 6.6; 1.7     | 0.315                            |
| Leukocytes (x10 <sup>3</sup> /μl): Mean; standard error of mean                     | 7.5; 0.4               | 7.8; 0.4    | 7.7; 0.4     | 0.964                            |
| Platelets (x10 <sup>3</sup> /μl): Mean; standard error of mean                      | 304.0; 27.8            | 279.0; 14.7 | 271.0; 14.6  | 0.684                            |
| LDH (U/l): Mean; standard error of mean                                             | 310.0; 35.1            | 338.0; 18.1 | 330.0; 17.4  | 0.809                            |
| Number of tumor deposits distant to the primary tumor: Mean; standard error of mean | 1.1; 1.1               | 0.5; 0.2    | 0.3; 0.1     | 0.664                            |
|                                                                                     |                        |             |              |                                  |
| <b>Metastatic cohort</b>                                                            | HPN staining intensity |             |              | p-value from Kruskal-Wallis test |
| Clinical/histopathological variables correlated with HPN                            | Low                    | Medium      | High         |                                  |
| Age at diagnosis (years): Mean; standard error of mean                              | 64.5; 2.7              | 63.9; 2.2   | 66.9; 1.5    | 0.727                            |
| CEA (ng/ml): Mean; standard error of mean                                           | 106.0; 44.4            | 72.5; 22.5  | 48.3; 11.0   | 0.614                            |
| Leukocytes (x10 <sup>3</sup> /μl): Mean; standard error of mean                     | 8.7; 0.5               | 9.9; 0.6    | 9.1; 0.6     | 0.481                            |

|                                                                                     |              |              |              |       |
|-------------------------------------------------------------------------------------|--------------|--------------|--------------|-------|
| Platelets ( $\times 10^3/\mu\text{l}$ ): Mean; standard error of mean               | 311.0; 19.2  | 284.0; 23.2  | 289.0; 16.2  | 0.527 |
| LDH (U/l): Mean; standard error of mean                                             | 496.0; 124.0 | 685.0; 122.0 | 939.0; 231.0 | 0.532 |
| Number of tumor deposits distant to the primary tumor: Mean; standard error of mean | 0.8; 0.4     | 1.4; 0.5     | 0.5; 0.2     | 0.417 |
