# Supplementary material for: Implication of Hepsin from Primary Tumor in the Prognosis of Colorectal Cancer Patients
Source: MDPI journal article supplement (doi:10.3390/cancers14133106), 2022-06-24
Supplement: s1 [file s1]

Table S2. Correlations between Hepsin staining intensity and time-to-event variables. The results of these correlations are shown for the overall cohort and localized and metastatic patients separately. HPN: Hepsin; N: number of patients for each hepsin staining intensity; CI: confidence interval; LL: lower limit; UL: upper limit; tft: Log-rank test for trends; Stat: statistical value; df: degrees of freedom; \*: significant *p*-value. † Follow-up limit reached.

| Overall cohort         |     |                           |                                               |                    |               |               |             |             |    |         |
|------------------------|-----|---------------------------|-----------------------------------------------|--------------------|---------------|---------------|-------------|-------------|----|---------|
| HPN staining intensity | N   | Death events              | 5-year overall survival (%)                   | Standard error (%) | LL CI 95% (%) | UL CI 95% (%) | p-value tft |             |    |         |
| High                   | 121 | 60                        | 41                                            | 6                  | 31            | 55            | 0.40        |             |    |         |
| Medium                 | 104 | 52                        | 59                                            | 6                  | 49            | 71            |             |             |    |         |
| Low                    | 61  | 29                        | 55                                            | 7                  | 43            | 71            |             |             |    |         |
|                        |     |                           |                                               |                    |               |               |             |             |    |         |
| HPN staining intensity | N   | Thrombosis events         | 5-year cumulative incidence of thrombosis (%) | Standard error (%) | LL CI 95% (%) | UL CI 95% (%) | p-value tft | Gray's test |    |         |
|                        |     |                           |                                               |                    |               |               |             | Stat        | df | p-value |
| High                   | 121 | 31                        | 30                                            | 5                  | 20            | 38            | 0.61        | 2.60        | 2  | 0.27    |
| Medium                 | 104 | 24                        | 26                                            | 5                  | 15            | 35            |             |             |    |         |
| Low                    | 61  | 10                        | 15                                            | 5                  | 5             | 24            |             |             |    |         |
| Localized cohort       |     |                           |                                               |                    |               |               |             |             |    |         |
| HPN staining intensity | N   | Death events              | 5-year overall survival (%)                   | Standard error (%) | LL CI 95% (%) | UL CI 95% (%) | p-value tft |             |    |         |
| High                   | 71  | 16                        | 63                                            | 9                  | 48            | 83            | 0.67        |             |    |         |
| Medium                 | 64  | 22                        | 70                                            | 7                  | 58            | 86            |             |             |    |         |
| Low                    | 34  | 8                         | 81                                            | 8                  | 67            | 99            |             |             |    |         |
|                        |     |                           |                                               |                    |               |               |             |             |    |         |
| HPN staining intensity | N   | Metastatic relapse events | 5-year disease-free survival (%)              | Standard error (%) | LL CI 95% (%) | UL CI 95% (%) | p-value tft |             |    |         |
| High                   | 71  | 26                        | 51                                            | 8                  | 37            | 71            | 0.16        |             |    |         |
| Medium                 | 64  | 22                        | 59                                            | 7                  | 46            | 75            |             |             |    |         |
| Low                    | 34  | 6                         | 73                                            | 10                 | 56            | 96            |             |             |    |         |

| HPN staining intensity | N  | Thrombosis events  | 5-year cumulative incidence of thrombosis (%)     | Standard error (%) | LL CI 95% (%) | UL CI 95% (%) | p-value tft | Gray's test |    |         |
|------------------------|----|--------------------|---------------------------------------------------|--------------------|---------------|---------------|-------------|-------------|----|---------|
|                        |    |                    |                                                   |                    |               |               |             | Stat        | df | p-value |
| High                   | 71 | 16                 | 23                                                | 5                  | 12            | 33            | 0.038*      | 19.38       | 2  | 0.009*  |
| Medium                 | 64 | 13                 | 22                                                | 6                  | 9             | 33            |             |             |    |         |
| Low                    | 34 | 1                  | 0                                                 | 0                  | 0             | 0             |             |             |    |         |
| Metastatic cohort      |    |                    |                                                   |                    |               |               |             |             |    |         |
| HPN staining intensity | N  | Death events       | 5-year overall survival (%)                       | Standard error (%) | LL CI 95% (%) | UL CI 95% (%) | p-value tft |             |    |         |
| High                   | 50 | 44                 | 18                                                | 6                  | 9             | 34            | 0.21        |             |    |         |
| Medium                 | 40 | 30                 | 41                                                | 8                  | 28            | 61            |             |             |    |         |
| Low                    | 27 | 21                 | 24                                                | 8                  | 12            | 48            |             |             |    |         |
|                        |    |                    |                                                   |                    |               |               |             |             |    |         |
| HPN staining intensity | N  | Progression events | 4-year <sup>†</sup> progression-free survival (%) | Standard error (%) | LL CI 95% (%) | UL CI 95% (%) | p-value tft |             |    |         |
| High                   | 44 | 43                 | 5                                                 | 3                  | 1             | 18            | 0.20        |             |    |         |
| Medium                 | 38 | 35                 | 11                                                | 5                  | 4             | 27            |             |             |    |         |
| Low                    | 25 | 24                 | 4                                                 | 4                  | 1             | 27            |             |             |    |         |
|                        |    |                    |                                                   |                    |               |               |             |             |    |         |
| HPN staining intensity | N  | Thrombosis events  | 5-year cumulative incidence of thrombosis (%)     | Standard error (%) | LL CI 95% (%) | UL CI 95% (%) | p-value tft | Gray's test |    |         |
|                        |    |                    |                                                   |                    |               |               |             | Stat        | df | p-value |
| High                   | 50 | 15                 | 43                                                | 9                  | 22            | 58            | 0.23        | 0.83        | 2  | 0.66    |
| Medium                 | 40 | 11                 | 31                                                | 9                  | 11            | 46            |             |             |    |         |
| Low                    | 27 | 9                  | 35                                                | 11                 | 13            | 52            |             |             |    |         |
