# Supplementary material for: Implication of Hepsin from Primary Tumor in the Prognosis of Colorectal Cancer Patients
Source: MDPI journal article supplement (doi:10.3390/cancers14133106), 2022-06-24
Supplement: s1 [file s1]

Table S4. Clinical scenario of localized patients who suffered from thrombosis during follow-up. For each patient, a series of characteristics potentially underlying the origin of the thrombotic event are shown. ID: identifier; PE: pulmonary embolism; DVT: deep vein thrombosis; NOS: not otherwise specified; NA: not applicable; CAPOX: Capecitabine + Oxaliplatin; FUOX: Fluorouracil + Oxaliplatin; 5FU: 5-Fluorouracil; FOLFIRI: Folinic acid + Fluorouracil + Irinotecan; SNG + NTP: Nasogastric tube+parenteral nutrition.

| Patient ID | Location of thrombosis | Months until thrombosis since tumor diagnosis | Patient suffers metastasis relapse before thrombosis? | Months between relapse and thrombosis | Hemostasis-related background before tumor diagnosis                    | Chemotherapy treatment before thrombosis | Months between chemotherapy and thrombosis | Particular incidents of each patient                                                                                                                                                                                      |
|------------|------------------------|-----------------------------------------------|-------------------------------------------------------|---------------------------------------|-------------------------------------------------------------------------|------------------------------------------|--------------------------------------------|---------------------------------------------------------------------------------------------------------------------------------------------------------------------------------------------------------------------------|
| 1          | Lower extremity, NOS   | 11.27                                         | No                                                    | NA                                    | Arterial hypertension/<br>dyslipidemia/<br>supraventricular tachycardia | Adjuvant CAPOX                           | 8.83                                       | At diagnosis of the colorectal tumor, the patient also had a spiculated nodule in the left upper lobe (it could be a parenchymal scar vs a primary neoplasm) that persisted in August 2018, four months before thrombosis |
| 2          | DVT, NOS               | 20.03                                         | No                                                    | NA                                    | NA                                                                      | NA                                       | NA                                         | NA                                                                                                                                                                                                                        |
| 3          | Head & neck            | 26.40                                         | No                                                    | NA                                    | NA                                                                      | NA                                       | NA                                         | Patient was admitted to the hospital for                                                                                                                                                                                  |

|    |                      |      |    |    |                                      |                                         |      |                                                                                                                                                          |
|----|----------------------|------|----|----|--------------------------------------|-----------------------------------------|------|----------------------------------------------------------------------------------------------------------------------------------------------------------|
|    |                      |      |    |    |                                      |                                         |      | ileostomy closure with transit reconstruction when he had the thrombosis                                                                                 |
| 4  | Lower extremity, NOS | 6.47 | No | NA | NA                                   | Adjuvant Capecitabine                   | 3.47 | NA                                                                                                                                                       |
| 5  | Splanchnic           | 4.90 | No | NA | Dyslipidemia                         | Adjuvant Capecitabine                   | 3.87 | NA                                                                                                                                                       |
| 6  | Femoral + PE         | 2.03 | No | NA | NA                                   | Neoadjuvant radiotherapy + Capecitabine | 1.20 | At the start of neoadjuvant treatment, patient suffered polymicrobial right sternoclavicular septic arthritis, with previous trauma in the affected area |
| 7  | PE, NOS              | 0.47 | No | NA | NA                                   | NA                                      | NA   | NA                                                                                                                                                       |
| 8  | Splanchnic           | 8.77 | No | NA | NA                                   | Adjuvant CAPOX                          | 2.67 | NA                                                                                                                                                       |
| 9  | Femoral              | 6.87 | No | NA | Arterial hypertension                | Adjuvant CAPOX                          | 3.97 | NA                                                                                                                                                       |
| 10 | PE, NOS              | 2.10 | No | NA | Arterial hypertension/<br>overweight | Adjuvant CAPOX                          | 0.90 | Two months before thrombosis, a right hemicolectomy was performed, and after the operation, there was a prolonged ileus that was resolved with           |

|    |                       |       |     |      |                                                                                     |                       |      |                                                                                                                              |
|----|-----------------------|-------|-----|------|-------------------------------------------------------------------------------------|-----------------------|------|------------------------------------------------------------------------------------------------------------------------------|
|    |                       |       |     |      |                                                                                     |                       |      | SNG+NTP treatment                                                                                                            |
| 11 | PE, NOS               | 5.17  | No  | NA   | NA                                                                                  | Adjuvant CAPOX        | 3.13 | NA                                                                                                                           |
| 12 | Calf vein             | 2.00  | No  | NA   | Arterial hypertension                                                               | Adjuvant CAPOX        | 1.00 | NA                                                                                                                           |
| 13 | Femoral               | 4.03  | No  | NA   | NA                                                                                  | Adjuvant CAPOX        | 3.03 | NA                                                                                                                           |
| 14 | PE, NOS               | 9.10  | No  | NA   | Dyslipidemia                                                                        | Adjuvant CAPOX+FUOX   | 6.50 | NA                                                                                                                           |
| 15 | Lower extremity, NOS  | 2.13  | No  | NA   | NA                                                                                  | Adjuvant Capecitabine | 0.47 | NA                                                                                                                           |
| 16 | Catheter-related + PE | 0.53  | No  | NA   | NA                                                                                  | NA                    | NA   | Patient had thrombosis the same month he had rectal surgery                                                                  |
| 17 | PE, NOS               | 4.07  | Yes | 2.30 | Arterial hypertension/<br>non-insulinized type-II diabetes mellitus                 | Oxaliplatin+Xeloda    | 2.13 | One month before thrombosis, it was detected a doubtful uterine myoma respecting its status as a primary or metastatic tumor |
| 18 | Femoral               | 33.43 | Yes | 3.03 | Arterial hypertension/<br>dyslipidemia/<br>type-II diabetes mellitus/<br>dyspnea on | Capecitabine+Avastin  | 2.47 | NA                                                                                                                           |

|    |                         |        |     |       |                                                                                               |                                      |       |                                                                                               |
|----|-------------------------|--------|-----|-------|-----------------------------------------------------------------------------------------------|--------------------------------------|-------|-----------------------------------------------------------------------------------------------|
|    |                         |        |     |       | exertion                                                                                      |                                      |       |                                                                                               |
| 19 | Femoral                 | 47.20  | Yes | 24.30 | NA                                                                                            | 5FU+Avastin                          | 5.57  | NA                                                                                            |
| 20 | PE, NOS                 | 35.10  | Yes | 9.23  | Dyslipidemia/<br>ischemic heart<br>disease                                                    | Oxaliplatin+5FU+Bevacizumab          | 11.40 | NA                                                                                            |
| 21 | PE, NOS                 | 12.37  | Yes | 0.10  | Dyslipidemia/<br>chronic arthritis<br>in lower<br>extremities                                 | NA                                   | NA    | Patient was admitted<br>to the hospital when he<br>suffered thrombosis                        |
| 22 | Lower<br>extremity, NOS | 22.33  | Yes | 3.00  | NA                                                                                            | Irinotecan+Cetuximab                 | 3.07  | NA                                                                                            |
| 23 | Splanchnic              | 9.77   | Yes | 1.70  | Patient walks<br>with help but<br>with difficulty<br>due to<br>shortening of<br>the right leg | NA                                   | NA    | NA                                                                                            |
| 24 | Head & neck             | 114.90 | Yes | 58.40 | Arterial<br>hypertension/<br>generalized<br>osteoarthritis                                    | NA                                   | NA    | The day when<br>thrombosis was<br>detected, patient had<br>previously fallen twice<br>at home |
| 25 | PE, NOS                 | 18.67  | Yes | 8.50  | NA                                                                                            | FOLFIRI+Avastin/Capecitabine+Avastin | 8.53  | NA                                                                                            |
| 26 | Splanchnic              | 62.17  | Yes | 14.47 | Arterial<br>hypertension/<br>dyslipidemia/                                                    | FOLFIRI                              | 8.43  | NA                                                                                            |

|    |                      |       |     |       |                                               |                             |       |                                                                                                                                             |
|----|----------------------|-------|-----|-------|-----------------------------------------------|-----------------------------|-------|---------------------------------------------------------------------------------------------------------------------------------------------|
|    |                      |       |     |       | embolic cardiovascular accident               |                             |       |                                                                                                                                             |
| 27 | Lower extremity, NOS | 28.03 | Yes | 11.80 | NA                                            | FOLFIRI+Aflibercept         | 6.73  | It was a patient treated with low molecular weight heparin who stopped taking it due to episodes of peristomal bleeding prior to thrombosis |
| 28 | Splanchnic           | 3.60  | Yes | 0.27  | Thoracic aortic aneurysm/ knee osteoarthritis | NA                          | NA    | NA                                                                                                                                          |
| 29 | PE, NOS              | 23.37 | Yes | 8.10  | Arterial hypertension/ polycythemia vera      | NA                          | NA    | NA                                                                                                                                          |
| 30 | Splanchnic           | 63.77 | Yes | 49.60 | Arterial hypertension/ dyslipidemia           | Oxaliplatin+5FU+Bevacizumab | 36.97 | Postoperative thrombosis                                                                                                                    |
