# Supplementary material for: Implication of Hepsin from Primary Tumor in the Prognosis of Colorectal Cancer Patients
Source: Cancers (Basel). 2022 Jun 24;14(13):3106. doi: 10.3390/cancers14133106 (PMC9264764; doi:10.3390/cancers14133106)
Supplement: Supplementary file 1 [file cancers-14-03106-s001.zip]

Archive with 6 entries (6 files):
- Supplementary material 1.pdf
- Supplementary material 2.pdf
- Supplementary material 3.pdf
- Supplementary material 4.pdf
- Supplementary material 5.pdf
- Supplementary material 6.pdf
